# Supplementary material for: In-syringe magnetic stirring assisted dispersive liquid–liquid micro-extraction with solvent washing for fully automated determination of cationic surfactants
Source: Royal Society of Chemistry journal article supplement (doi:10.1039/c4ay01695e), 2014-01-01
Supplement: c4ay01695e1.pdf [file c4ay01695e1.pdf]

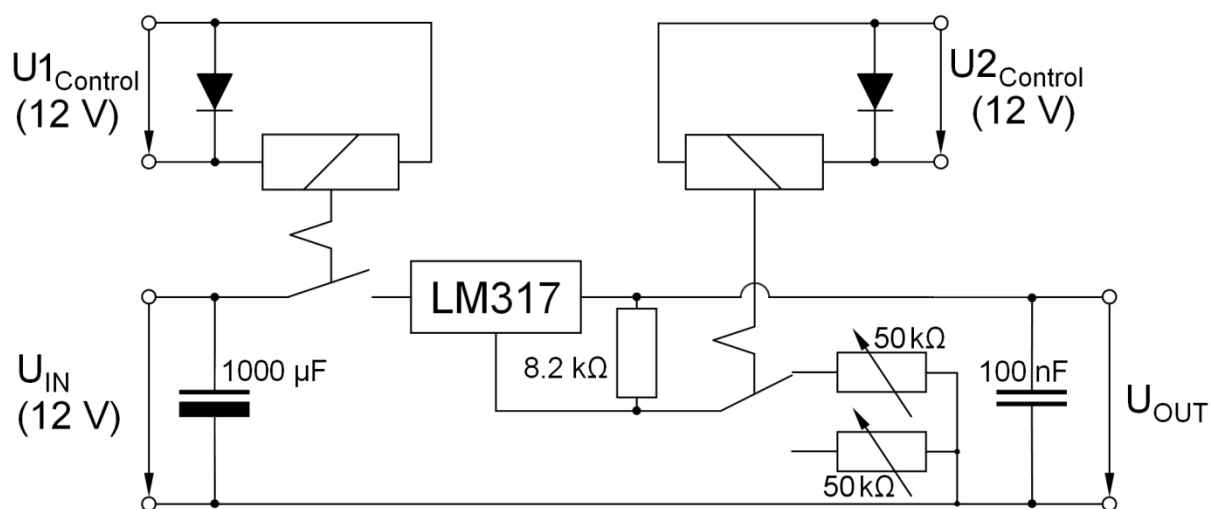

Supplementary material 1: Control circuit for the DC motor used for in-syringe stirring. By using two different auxiliary analog outputs on the multisyringe device, stirring enabling and selection of two different stirring velocities were achieved.

Supplementary material 2: Procedure 1 for automated in-syringe stirring-assisted DLLME of cationic surfactants without organic phase washing (simple extraction).

| No  | Instrument | Instruction                                                      | Comment                                                              |
|-----|------------|------------------------------------------------------------------|----------------------------------------------------------------------|
| 1a  | SV         | Move to position 4                                               |                                                                      |
| 1b  | MS         | Pickup 0.60 ml at 7.5 mL/min [V in ON, U1 ON, U2 OFF], Wait 2 s  | Clean syringe with sample with stirring at high speed, 3x repetition |
| 1c  | MS         | Empty at 15 mL/min [V in OFF, U1 OFF, U2 OFF]                    |                                                                      |
| 2a  | SV         | Move to position 5                                               |                                                                      |
| 2b  | MS         | Pickup 0.25 ml at 7.5 mL/min [V in ON, U1 OFF, U2 OFF], Wait 2 s | Aspiration of buffer                                                 |
| 3a  | SV         | Move to position 6                                               |                                                                      |
| 3b  | MS         | Pickup 0.15 ml at 7.5 mL/min [V in ON, U1 OFF, U2 OFF], Wait 2 s | Aspiration of dye                                                    |
| 4a  | SV         | Move to position 4                                               |                                                                      |
| 4b  | MS         | Pickup 4.00 ml at 7.5 mL/min [V in ON, U1 ON, U2 ON], Wait 2 s   | Aspiration of sample with stirring at low speed                      |
| 5   | MS         | No flow step [V in OFF, U1 OFF, U2 OFF]                          | Stop stirring                                                        |
| 6a  | SV         | Move to position 7                                               |                                                                      |
| 6b  | MS         | Pickup 0.22 ml at 2.5 mL/min [V in ON, U1 OFF, U2 OFF], Wait 1 s | Aspiration of organic phase                                          |
| 7a  | SV         | Move to position 2                                               |                                                                      |
| 7b  | MS         | Pickup 0.22 ml at 2.5 mL/min [V in ON, U1 ON, U2 ON]             | Aspiration of air with stirring at low speed                         |
| 8a  | MS         | No flow step [V in OFF, U1 ON, U2 OFF]                           |                                                                      |
| 8b  | Wait       | Wait 35 s                                                        | Stirring at high speed for DLLME                                     |
| 9a  | MS         | No flow step [V in OFF, U1 ON, U2 ON]                            |                                                                      |
| 9b  | Wait       | Wait 5 seconds                                                   | Decreasing to stirring at low speed                                  |
| 10a | MS         | No flow step [V in OFF, U1 OFF, U2 OFF]                          |                                                                      |
| 10b | Wait       | Wait 35 seconds                                                  | Stop stirring and phase separation                                   |
| 11a | D          | Measurement at 638 nm against 550 nm                             |                                                                      |
| 11b | MS         | Dispense 0.75 ml at 1.5 mL/min [V in OFF, U1 OFF, U2 OFF]        | Dispense of organic phase to detection cell and measurement          |
| 11c | D          | Stop measure                                                     |                                                                      |
| 12  | MS         | Priming in dispense at 15 mL/min [V in OFF, U1 OFF, U2 OFF]      | Empty syringe to waste at high flow rate                             |

Supplementary material 3: Procedures 2 for automated in-syringe stirring-assisted DLLME of cationic surfactants with double organic phase washing.

| No  | Instrument | Instruction                                                           | Comment                                                              |
|-----|------------|-----------------------------------------------------------------------|----------------------------------------------------------------------|
| 1a  | SV         | Move to position 4                                                    |                                                                      |
| 1b  | MS         | Pickup 0.60 ml at 7.5 mL/min [V in ON, U1 ON, U2 OFF], Wait 2 s       | Clean syringe with sample with stirring at high speed, 3x repetition |
| 1c  | MS         | Empty at 15 mL/min [V in OFF, U1 OFF, U2 OFF]                         |                                                                      |
| 2a  | SV         | Move to position 5                                                    |                                                                      |
| 2b  | MS         | Pickup 0.25 ml at 7.5 mL/min [V in ON, U1 OFF, U2 OFF], Wait 2 s      | Aspiration of buffer                                                 |
| 3a  | SV         | Move to position 6                                                    |                                                                      |
| 3b  | MS         | Pickup 0.15 ml at 7.5 mL/min [V in ON, U1 OFF, U2 OFF], Wait 2 s      | Aspiration of dye                                                    |
| 4a  | SV         | Move to position 4                                                    |                                                                      |
| 4b  | MS         | Pickup 4.00 ml at 7.5 mL/min [V in ON, U1 ON, U2 ON], Wait 2 s        | Aspiration of sample with stirring at low speed                      |
| 5   | MS         | No flow step [V in OFF, U1 OFF, U2 OFF]                               | Stop stirring                                                        |
| 6a  | SV         | Move to position 7                                                    |                                                                      |
| 6b  | MS         | Pickup 0.26 ml at 2.5 mL/min [V in ON, U1 OFF, U2 OFF], Wait 1 s      | Aspiration of organic phase                                          |
| 7a  | SV         | Move to position 2                                                    |                                                                      |
| 7b  | MS         | Pickup 0.22 ml at 2.5 mL/min [V in ON, U1 ON, U2 ON]                  | Aspiration of air with stirring at low speed                         |
| 8a  | MS         | No flow step [V in OFF, U1 ON, U2 OFF]                                |                                                                      |
| 8b  | Wait       | Wait 35 s                                                             | Stirring at high speed for DLLME                                     |
| 9a  | MS         | No flow step [V in OFF, U1 ON, U2 ON]                                 |                                                                      |
| 9b  | Wait       | Wait 5 seconds                                                        | Decreasing to stirring at low speed                                  |
| 10a | MS         | No flow step [V in OFF, U1 OFF, U2 OFF]                               |                                                                      |
| 10b | Wait       | Wait 35 seconds                                                       | Stop stirring and phase separation                                   |
| 11a | SV         | Move to position 2.                                                   |                                                                      |
| 11b | MS         | Dispense 0.28 ml at 2.5 mL/min [V in ON, U1 OFF, U2 OFF], Wait 1 s    | Dispense organic phase into holding coil                             |
| 12  | MS         | Priming in dispense at 15 mL/min [V in OFF, U1 OFF, U2 OFF], Wait 1 s | Dispense rest content of syringe to waste                            |
| 13a | SV         | Move to position 3.                                                   |                                                                      |
| 13b | MS         | Pickup 2.00 ml at 7.5 mL/min [V in ON, U1 OFF, U2 OFF], Wait 1 s      | Aspiration of water                                                  |
| 14a | SV         | Move to position 2                                                    |                                                                      |
| 14b | MS         | Pickup 0.22 ml at 7.5 mL/min [V in ON, U1 ON, U2 ON]                  | Aspiration of air with stirring at low velocity                      |
| 15  | Wait       | Wait 20 s                                                             | Stirring at low speed for extract washing with water                 |
| 16a | MS         | No flow step [V in OFF, U1 OFF, U2 OFF]                               | Stop stirring and phase separation                                   |
| 16b | Wait       | Wait 20 seconds                                                       |                                                                      |
| 17a | SV         | Move to position 2.                                                   |                                                                      |
| 17b | MS         | Dispense 0.28 ml at 2.5 mL/min [V in ON, U1 OFF, U2 OFF], Wait 1 s    | Dispense solvent into HC                                             |
| 18a | MS         | Priming in dispense at 15 mL/min [V in OFF, U1 OFF, U2 OFF], Wait 1 s | Dispense rest content of syringe to waste                            |
| 18b | SV         | Move to position 3.                                                   |                                                                      |
| 18c | MS         | Pickup 2.00 ml at 7.5 mL/min [V in ON, U1 OFF, U2 OFF], Wait 1 s      | Aspiration of water                                                  |
| 19a | SV         | Move to position 5.                                                   |                                                                      |
| 19b | MS         | Pickup 0.15 ml at 7.5 mL/min [V in ON, U1 OFF, U2 OFF], Wait 1        | Aspiration of barium acetate                                         |
| 20a | SV         | Move to position 6.                                                   |                                                                      |
| 20b | MS         | Pickup 0.20 ml at 7.5 mL/min [V in ON, U1 OFF, U2 OFF], Wait 1 s      | Aspiration of dye                                                    |
| 21a | SV         | Move to position 2                                                    |                                                                      |
| 21b | MS         | Pickup 0.22 ml at 7.5 mL/min [V in ON, U1 OFF, U2 OFF]                | Aspiration of air with stirring at low speed                         |
| 22a | MS         | No flow step [V in OFF, U1 ON, U2 OFF]                                |                                                                      |
| 22b | Wait       | Wait 35 s                                                             | Stirring at high speed for DLLME                                     |
| 22c | MS         | No flow step [V in OFF, U1 ON, U2 ON]                                 | Decreasing to stirring at low speed                                  |
| 23a | MS         | No flow step [V in OFF, U1 OFF, U2 OFF]                               | Stop stirring and phase separation                                   |
| 23b | Wait       | Wait 35 seconds                                                       |                                                                      |
| 24a | D          | Measurement at 638 nm against 550 nm                                  |                                                                      |
| 24b | MS         | Dispense 0.75 ml at 1.5 mL/min [V in OFF, U1 OFF, U2 OFF]             | Dispense of organic phase to detection cell and measurement          |
| 24c | D          | Stop measure                                                          |                                                                      |
| 25  | MS         | Priming in dispense at 15 mL/min [V in OFF, U1 OFF, U2 OFF]           | Empty syringe to waste at high flow rate                             |

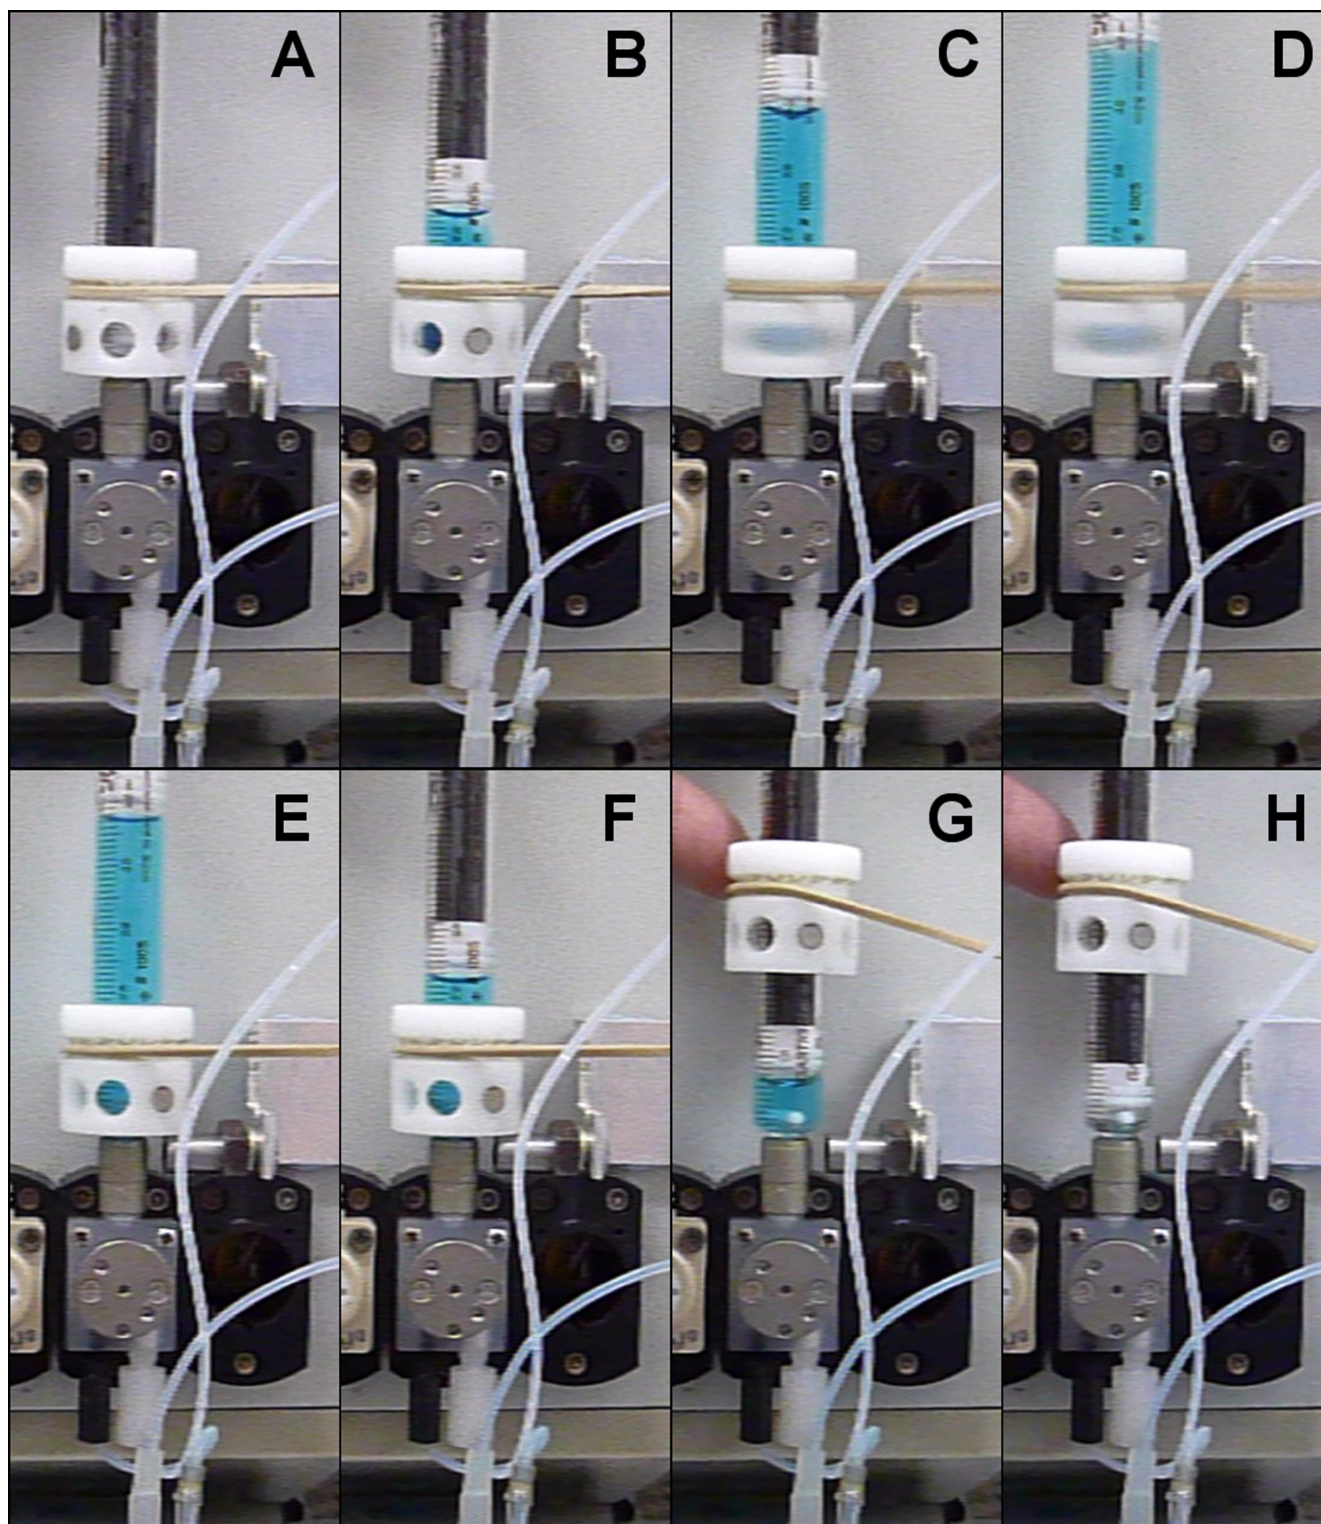

Supplementary material 4: Photo documentation of operation scheme of the simple extraction procedure 2. a: aspiration of dye, b: aspiration of buffer and sample, c: mixing of solutions at low stirring speed, d: DLLME at high stirring speed, e: phase separation, f+g: dispense of aqueous phase, h: final / initial piston position.

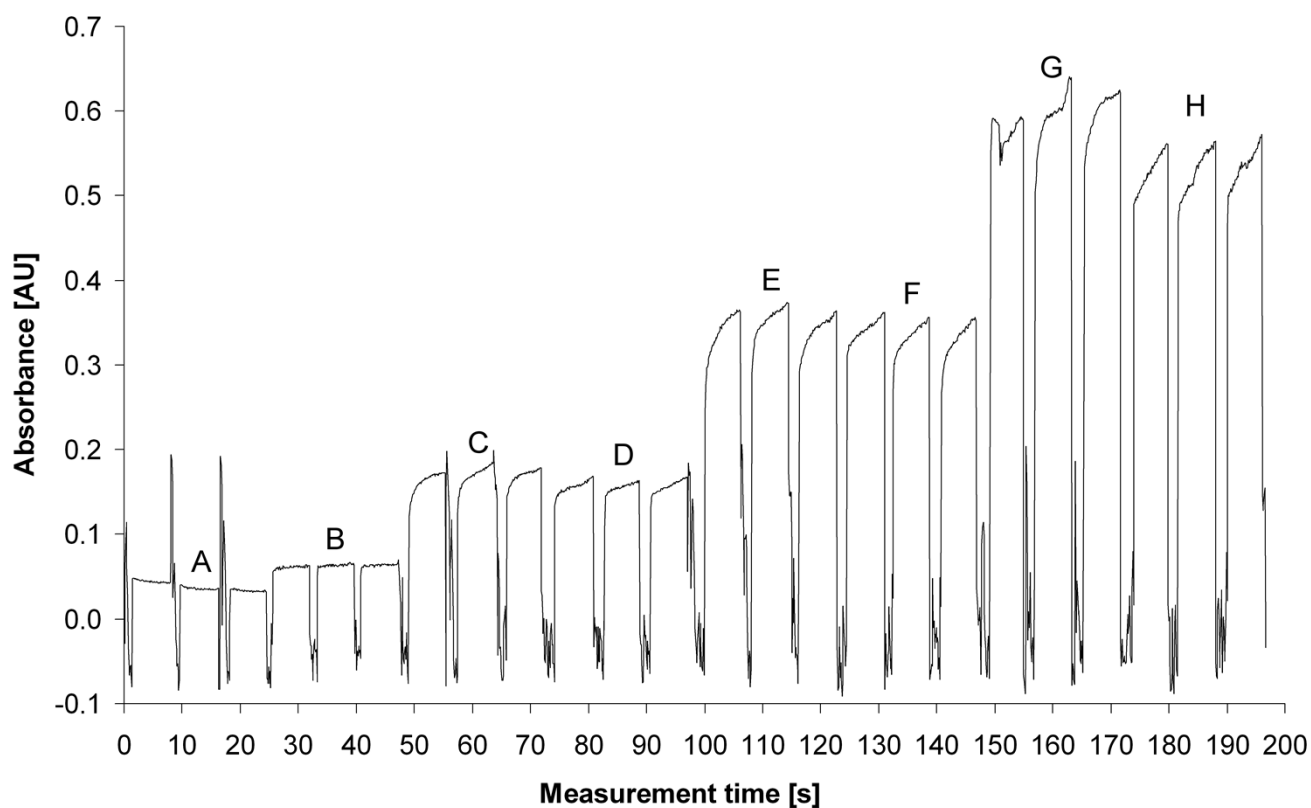

Supplementary material 5: Example of peak signals of calibration with water standards of blank,  $0.25 \mu\text{mol L}^{-1}$ ,  $0.50 \mu\text{mol L}^{-1}$ , and  $0.75 \mu\text{mol L}^{-1}$  using 3 mL of standard and 1 mL of water, performed with both procedure 1 (A, C, E, G) and 2 (B, D, F, H).

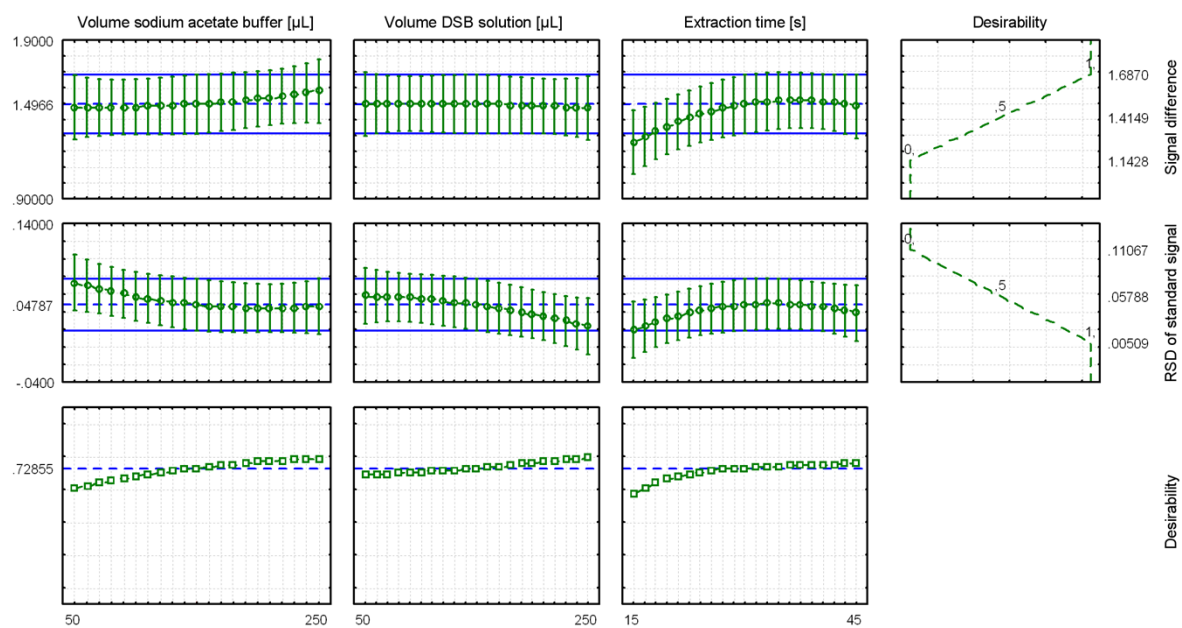

Supplementary material 6: Box-Behnken experimental design for the optimization of the volumes of buffer and DSB stock solutions and extraction time. Conditions: blank and 4.1 mL  $1 \mu\text{mol L}^{-1}$  CTAB solution with the addition of  $0.2 \mu\text{mol L}^{-1}$  SDS, phase separation time 35 s.

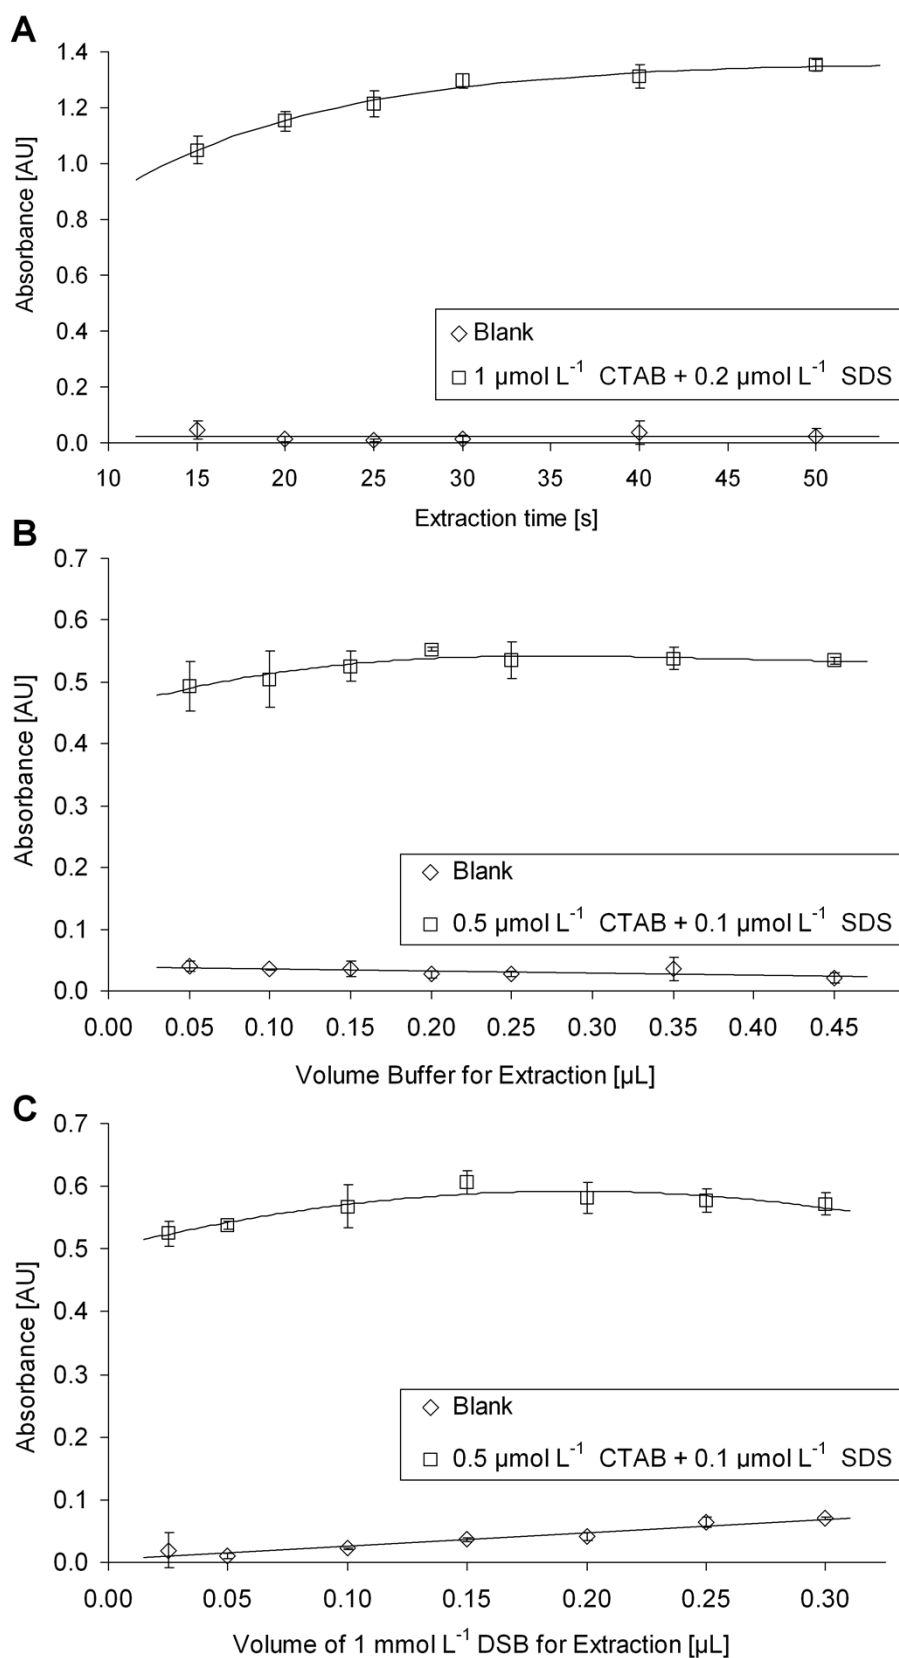

Supplementary material 7: Optimization of parameters for simple extraction being the stirring time (a), volume of acetate buffer solution (b), and the volume of DSB solution (c). Conditions (a) 200  $\mu\text{L}$  5 %v/v n-HexOH in  $\text{CCl}_3\text{H}$ , 4.1 mL STD  $1 \mu\text{mol L}^{-1}$  CTAB +  $0.2 \mu\text{mol L}^{-1}$  SDS, 250  $\mu\text{L}$  acetate buffer pH 5.0, 150  $\mu\text{L}$   $1 \text{ mmol L}^{-1}$  DSB, separation time 35 s. (b) as in (a) but 250  $\mu\text{L}$  organic solvent, 3.9 mL STD  $0.5 \mu\text{mol L}^{-1}$  CTAB +  $0.1 \mu\text{mol L}^{-1}$  SDS, extraction time 35 s (c) as in (b) but 3.7 mL STD, 250  $\mu\text{L}$  of acetate buffer pH 5.0.

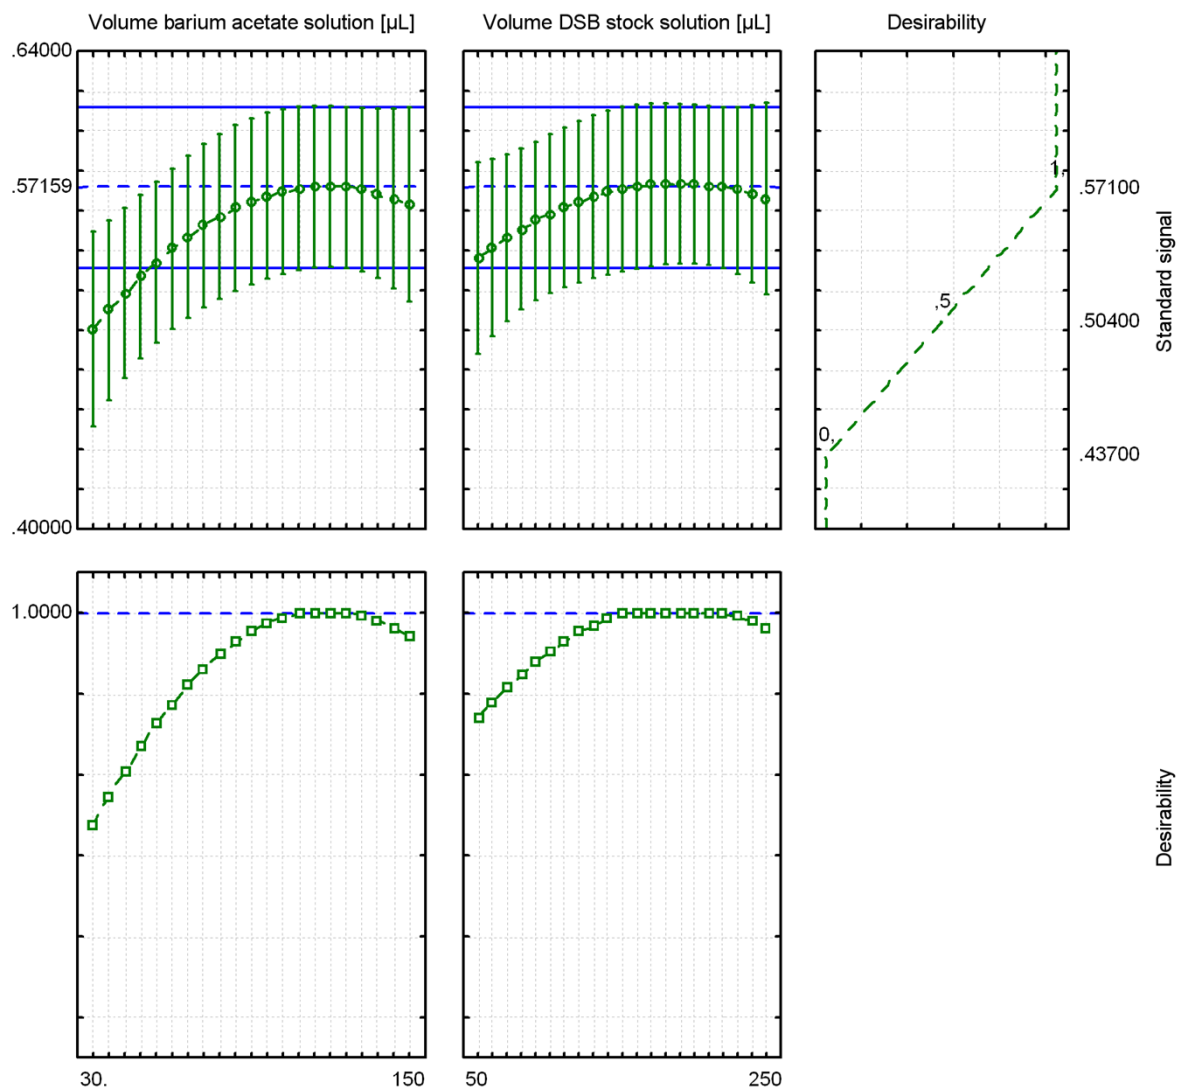

Supplementary material 8: Box-Behnken experimental design for the optimization of the volumes of barium acetate and DSB stock solutions for extraction solvent washing. Conditions as given in supplement material 7 C but using 150 μL of 1 mmol L<sup>-1</sup> DSB for the first extraction and 35 s for the organic phase washing.



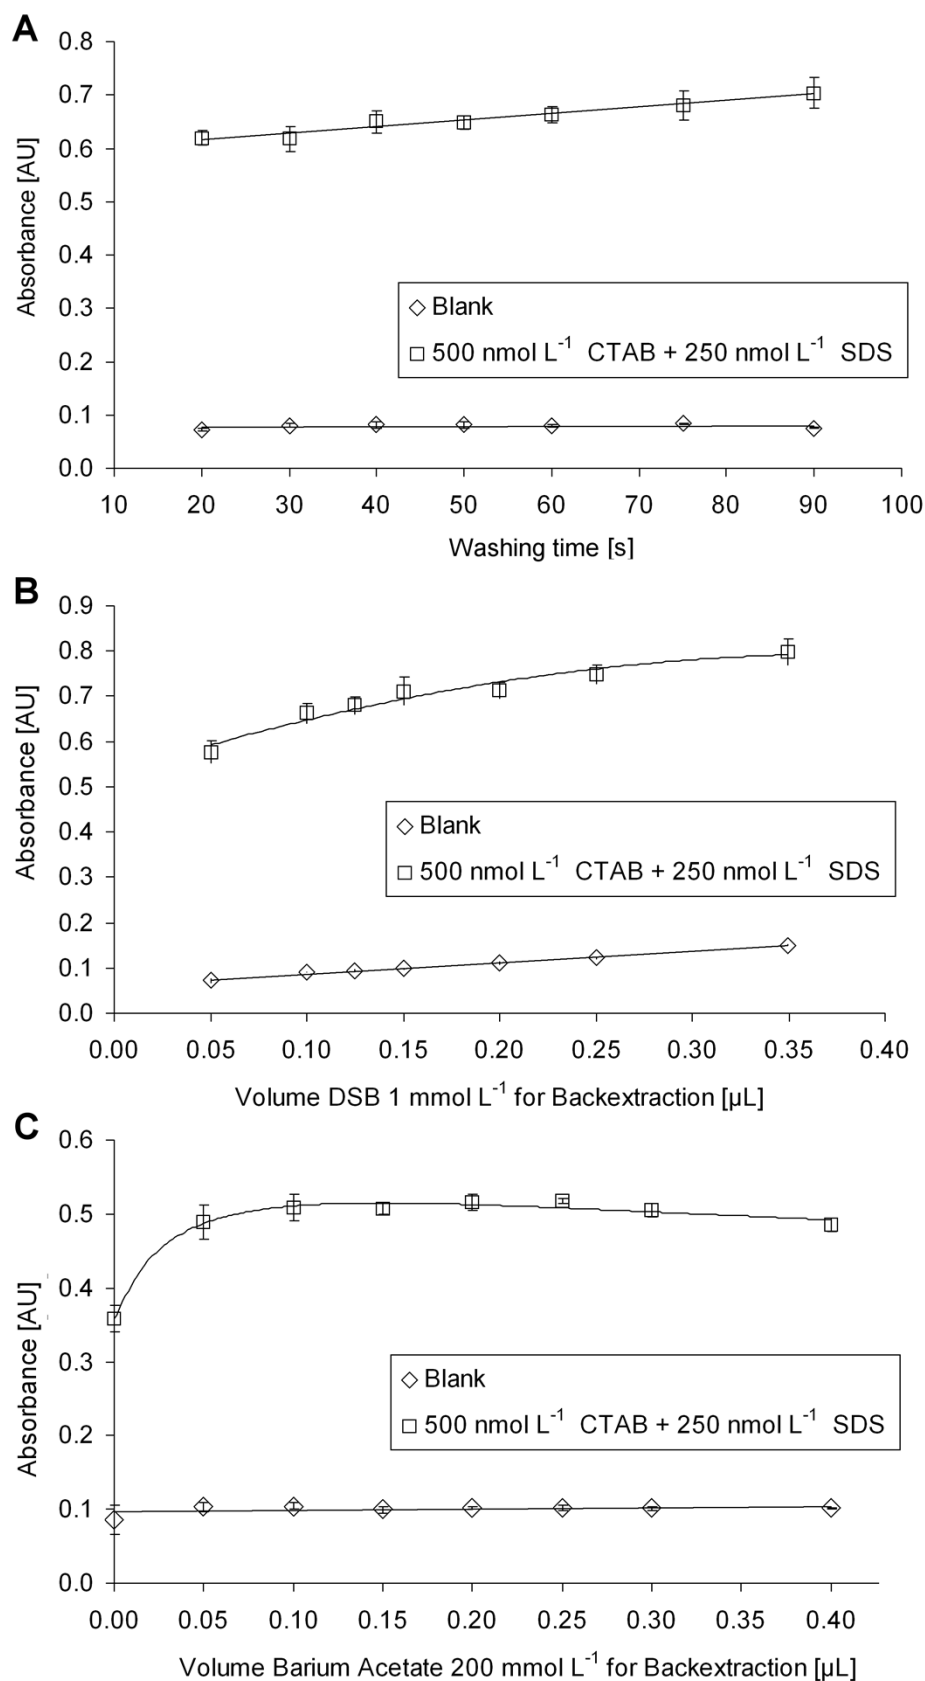

Supplementary material 9: Optimisation of parameters for extract washing being the stirring time (a), volume of DSB solution (b), and the volume of barium acetate solution (c). Conditions in a: 0.25 mL of 5 %v/v hexanol/chloroform, 4 mL of sample (STD 0.5  $\mu\text{mol L}^{-1}$  CTAB + 0.1  $\mu\text{mol L}^{-1}$  SDS), 0.25 mL of R1, 0.15 mL of R2, 35 s extraction time, 35 s separation time 1 and 2, washing with 2 mL of water, 0.075 mL of R2, and 0.2 mL of R3. b: as in (a) but applying 50 s washing time. c: as in (a) but applying 0.2 mL of 1 mmol L<sup>-1</sup> DSB stock solution.
